# Supplementary material
Source: Royal Society of Chemistry journal article supplement (doi:10.1039/d6gc00372a)
Supplement: d6gc00372a1.pdf [file d6gc00372a1.pdf]

## Supplementary Material

### Enhanced lignin hydrogenolysis by *in-situ* hydrogen supply through methanol-water aqueous phase reforming over CoTi@biochar catalyst

Tao Yin, Zhaoyuan Huang, Bowen Luo, Zhipeng Tian,\* Chao Wang, Jianping Liu, Ying Chen,

Riyang Shu\*

*\*Guangdong Provincial Key Laboratory of Functional Soft Condensed Matter, School of Materials  
and Energy, Guangdong University of Technology, Guangzhou 510006, PR China*

Corresponding author: tianzhipeng@gdut.edu.cn (Zhipeng Tian); shuriyang@gdut.edu.cn (Riyang  
Shu).

**Table S1** Assignment of main  $^{13}\text{C}$ - $^1\text{H}$  cross-signals in the HSQC spectra of the lignin depolymerization non-volatile products.

| Catalyst          | $\delta_{\text{C}}/\delta_{\text{H}}/\text{ppm}$ | Assignment                                                                         |
|-------------------|--------------------------------------------------|------------------------------------------------------------------------------------|
| -OCH <sub>3</sub> | 56.0/3.8                                         | Methoxy structure on benzene ring                                                  |
| A $\alpha$        | 71.6/4.7                                         | C $_{\alpha}$ -H $_{\alpha}$ in the structure of $\beta$ -O-4                      |
| A $\beta$         | 80.5/4.4 & 83.9/4.3                              | C $_{\beta}$ -H $_{\beta}$ in the structure of $\beta$ -O-4 connecting the G units |
| A $\gamma$        | 60.4/3.6                                         | C $_{\gamma}$ -H $_{\gamma}$ in the structure of $\beta$ -O-4                      |
| A $\gamma'$       | 63.0/3.8-4.10                                    | C $_{\gamma}$ -H $_{\gamma}$ in the structure of the acetylated $\beta$ -O-4       |
| B $\alpha$        | 85.4/4.6                                         | C $_{\alpha}$ -H $_{\alpha}$ of $\beta$ - $\beta$ in resinoid alcohol              |
| B $\beta$         | 53.5/3.07                                        | C $_{\beta}$ -H $_{\beta}$ of $\beta$ - $\beta$ in resinoid alcohol                |
| B $\gamma$        | 72.9/3.7                                         | C $_{\gamma}$ -H $_{\gamma}$ of $\beta$ - $\beta$ in resinoid alcohol              |
| C $\alpha$        | 87.5/5.4                                         | C $_{\alpha}$ -H $_{\alpha}$ in phenylcoumarin                                     |
| C $\beta$         | 49.8/3.6                                         | C $_{\beta}$ -H $_{\beta}$ in phenylcoumarin                                       |
| C $\gamma$        | 62.9/3.6                                         | C $_{\gamma}$ -H $_{\gamma}$ in phenylcoumarin                                     |
| D                 | 60.6/4.0                                         | pinacol                                                                            |
| G2                | 112.6/6.8                                        | C $_2$ -H $_2$ in guaiacyl (G)                                                     |
| G5                | 115.6/6.7                                        | C $_5$ -H $_5$ in guaiacyl (G)                                                     |
| G6                | 121.1/6.5                                        | C $_6$ -H $_6$ in guaiacyl (G)                                                     |
| FA2               | 110.3/7.2                                        | C $_2$ -H $_2$ in the structure of ferulic acid esters                             |
| FA6               | 124.2/6.9                                        | C $_6$ -H $_6$ in the structure of ferulic acid esters                             |
| PCE2,6            | 128.7/7.2                                        | C $_{2,6}$ -H $_{2,6}$ in p-coumarate structure                                    |
| H2,6              | 125.8/6.9                                        | C $_{2,6}$ -H $_{2,6}$ in p-hydroxyphenyl structure                                |
| X5                | 62.8/3.3                                         | C $_5$ -H $_5$ in $\beta$ -D-pyranopyranoside                                      |

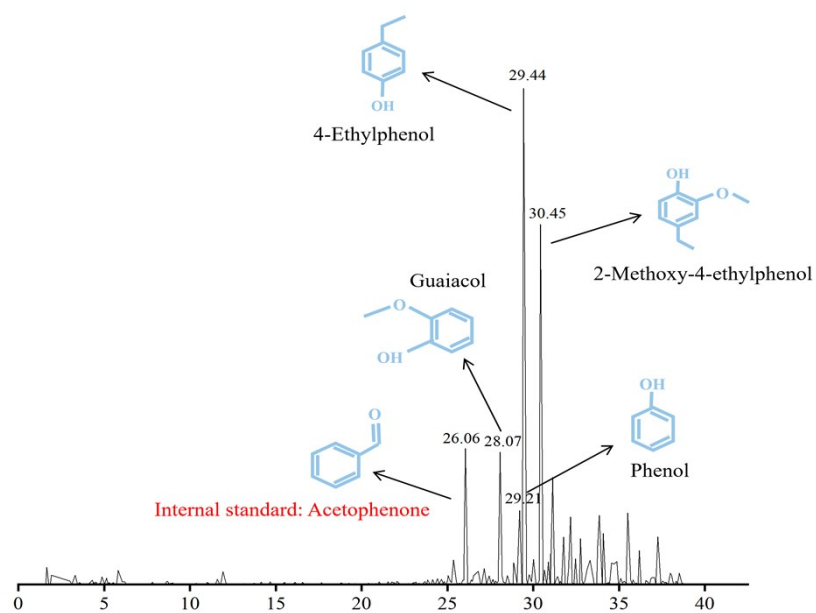

**Fig. S1.** GC-MS chromatogram of the aromatic monomers from lignin depolymerization catalyzed by CoTi@BC catalyst.

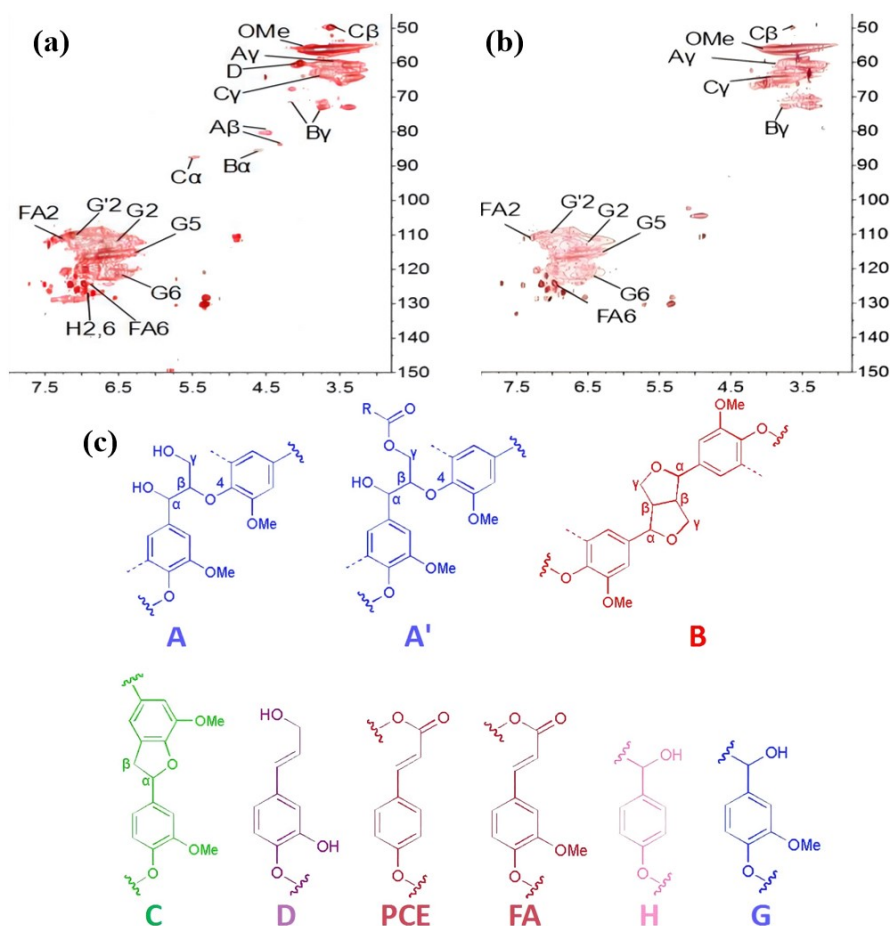

**Fig. S2.** 2D-HSQC NMR spectra of (a) enzymatic lignin, (b) after hydrogenolysis of enzymatic lignin with CoTi@BC catalysts and (c) the classical bonding patterns.

Note: Symbol attribution is detailed in Table S1 (assignment of main  $^{13}\text{C}$ - $^1\text{H}$  cross-signals in the HSQC spectra of the enzymatic lignin).

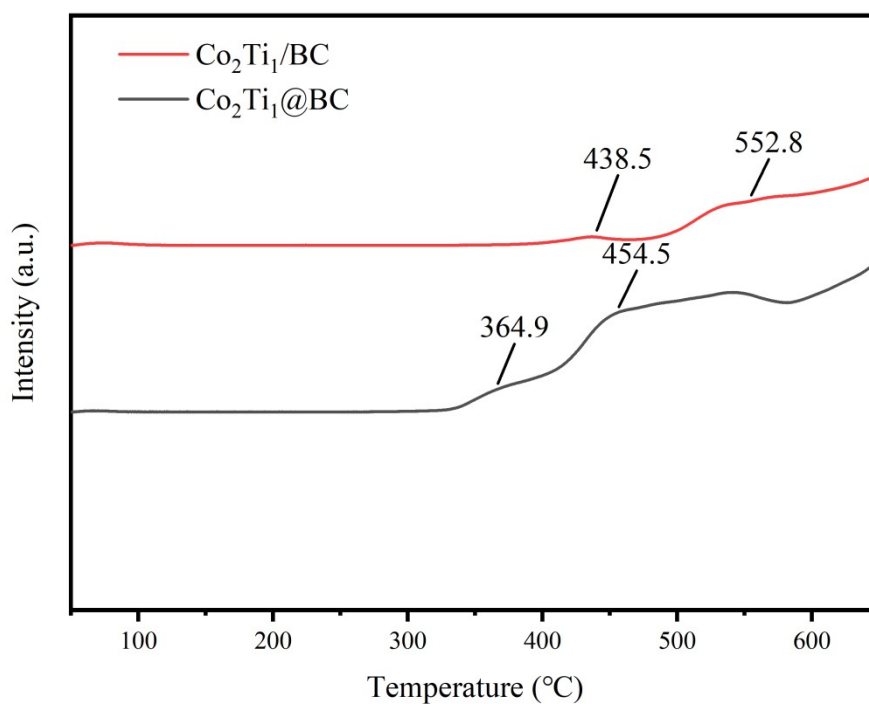

**Fig. S3.** The H<sub>2</sub>-TPD profiles of Co<sub>2</sub>Ti<sub>1</sub>@BC and Co<sub>2</sub>Ti<sub>1</sub>/BC catalysts.

**Table S2.** The H<sub>2</sub>-TPD profiles of Co<sub>2</sub>Ti<sub>1</sub>@BC and Co<sub>2</sub>Ti<sub>1</sub>/BC catalysts.

| Catalysts                           | Hydrogen adsorption amount (mmol/g) <sup>a</sup> | Sample mass (g) | Co loading <sup>b</sup> (wt.%) | Co dispersion (%) |
|-------------------------------------|--------------------------------------------------|-----------------|--------------------------------|-------------------|
| Co <sub>2</sub> Ti <sub>1</sub> @BC | 0.455                                            | 0.060g          | 9.92                           | 8.9               |
| Co <sub>2</sub> Ti <sub>1</sub> /BC | 0.102                                            | 0.060g          | 10.06                          | 2.0               |

<sup>a</sup> Data derived from H<sub>2</sub>-TPD characterization.

<sup>b</sup> Data derived from ICP-AES results.

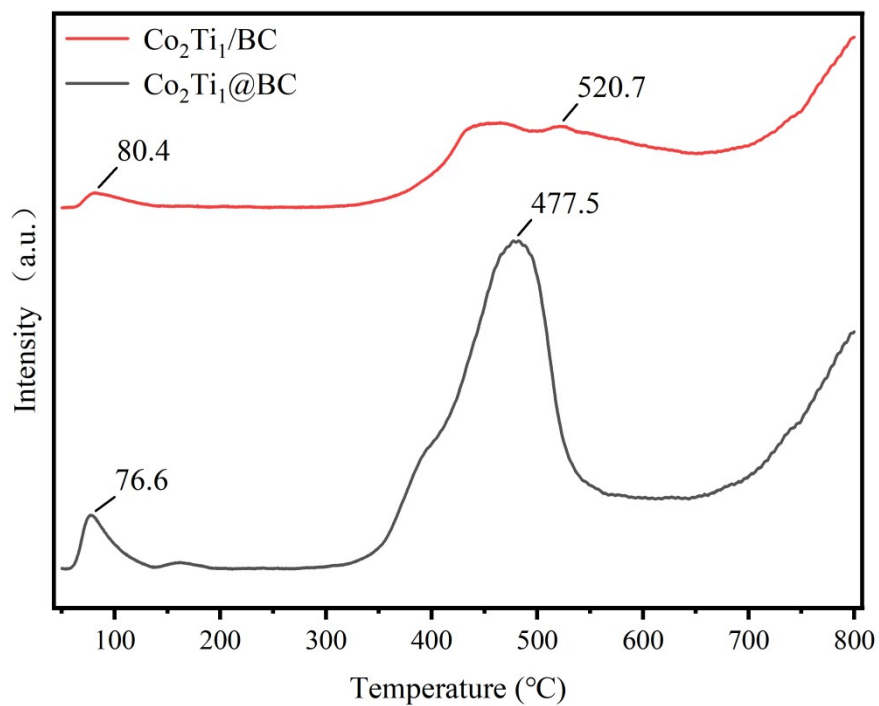

**Fig. S4.** The NH<sub>3</sub>-TPD profiles of Co<sub>2</sub>Ti<sub>1</sub>@BC and Co<sub>2</sub>Ti<sub>1</sub>/BC catalysts.

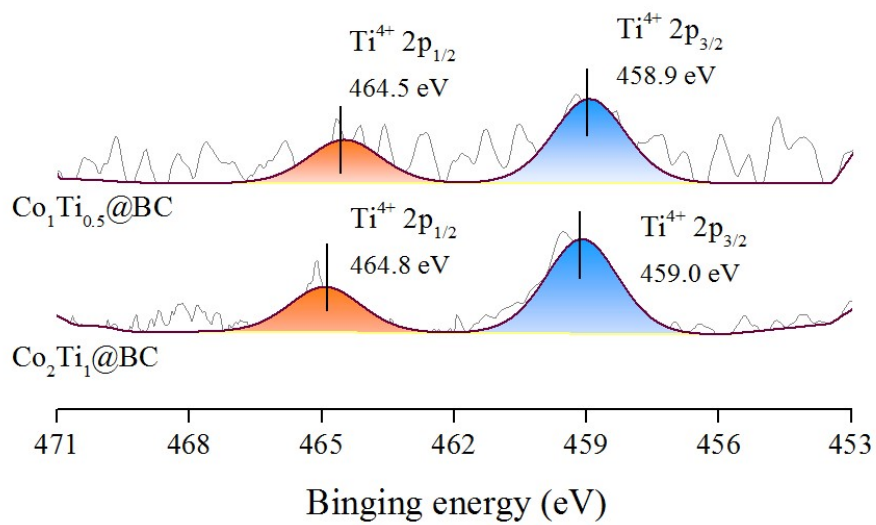

**Fig. S5.** The deconvoluted XPS spectra of Ti in the different Co-based catalysts.

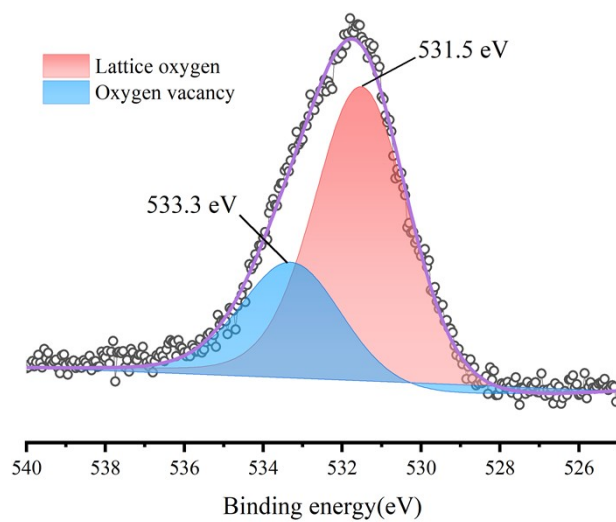

**Fig. S6.** The deconvoluted XPS O 1s spectra of Co<sub>2</sub>Ti<sub>1</sub>@BC catalyst.

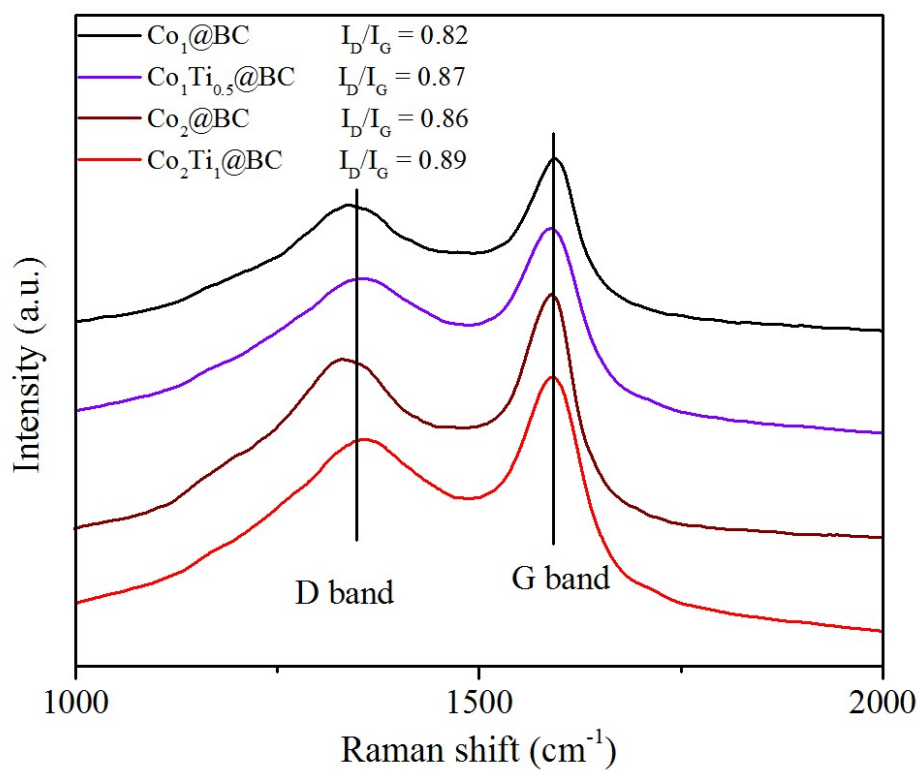

**Fig. S7.** The Raman spectra of different Co-based catalysts.

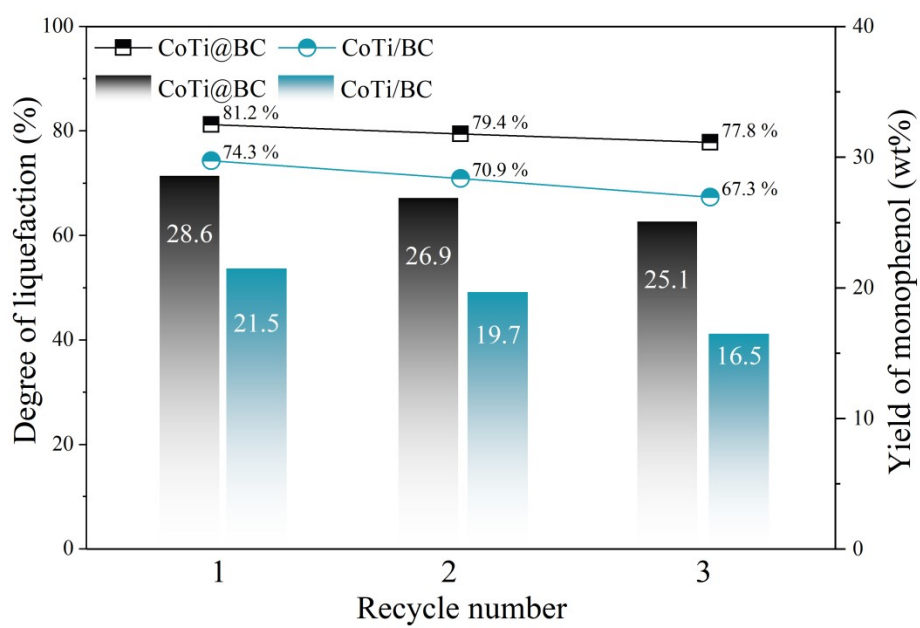

**Fig. S8.** The reusability of  $\text{Co}_2\text{Ti}_1@\text{BC}$  and  $\text{Co}_2\text{Ti}_1/\text{BC}$  catalysts.

Reaction conditions: 0.5 g enzymatic lignin, 0.2 g catalyst, 20 mL methanol-water solution, 2 MPa

Ar, 250 °C, 4 hours.

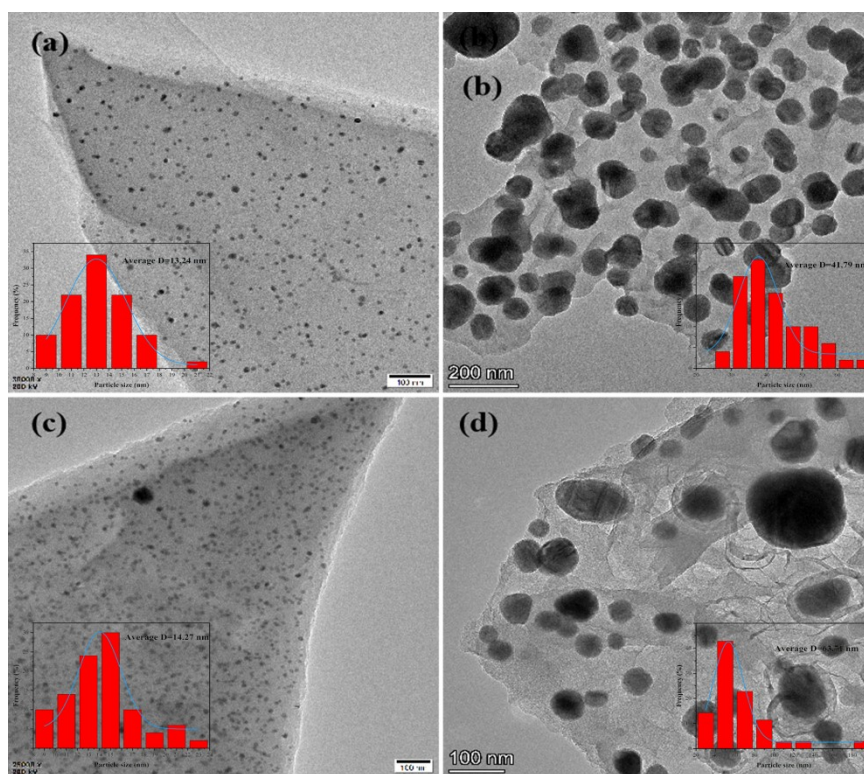

**Fig. S9.** TEM image of different Co-based catalysts. (a)  $\text{Co}_2\text{Ti}_1@\text{BC}$ , (b)  $\text{Co}_2\text{Ti}_1/\text{BC}$ , (c) recycled  $\text{Co}_2\text{Ti}_1@\text{BC}$  and (d) recycled  $\text{Co}_2\text{Ti}_1/\text{BC}$  catalyst

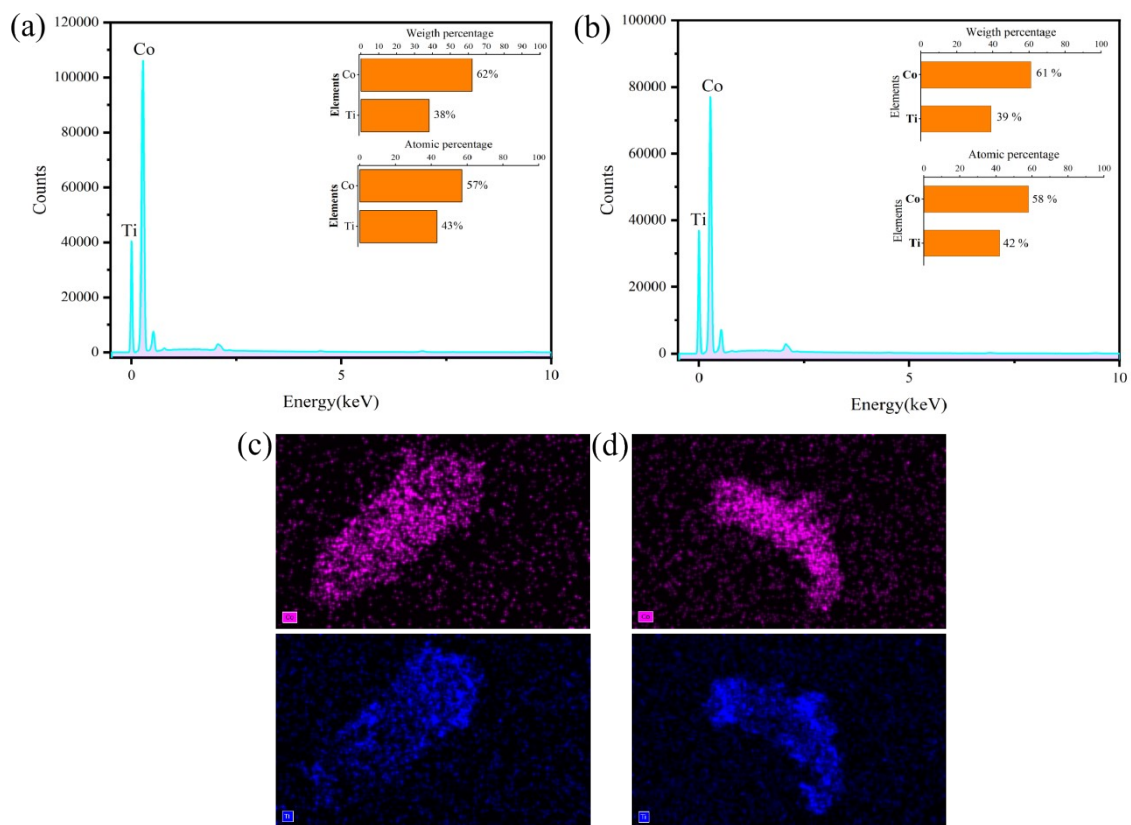

**Fig. S10.** The SEM-EDS analysis and elemental mapping of the (a) (c) fresh and (b) (d) used  $\text{Co}_2\text{Ti}_1@BC$  catalysts.

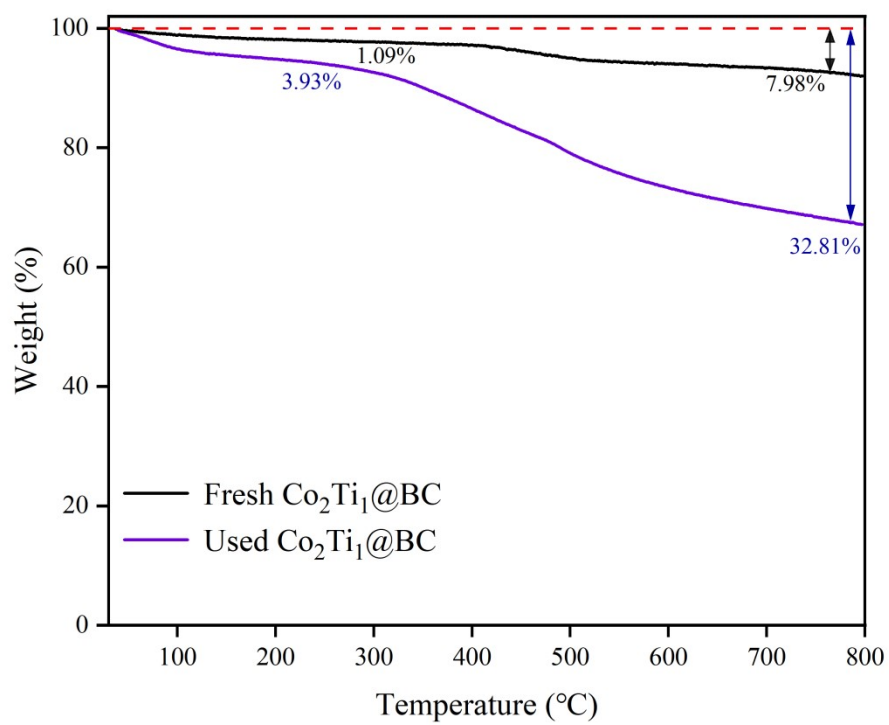

**Fig. S11.** TGA profiles of the fresh Co<sub>2</sub>Ti<sub>1</sub>@BC and used Co<sub>2</sub>Ti<sub>1</sub>@BC catalysts.

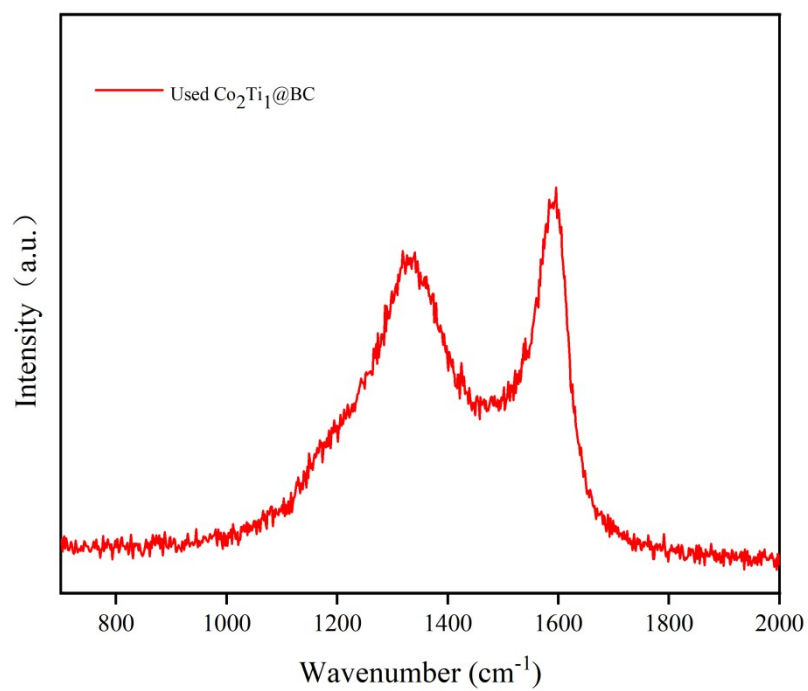

**Fig. S12.** Raman spectra of used  $\text{Co}_2\text{Ti}_1@\text{BC}$  catalysts.
